# Supplementary material for: Systematic Evaluation of Voriconazole Pharmacokinetic Models without Pharmacogenetic Information for Bayesian Forecasting in Critically Ill Patients
Source: MDPI journal article supplement (doi:10.3390/pharmaceutics14091920), 2022-09-10
Supplement: s1 [file s1]

# Systematic Evaluation of Voriconazole Pharmacokinetic Models without Pharmacogenetic Information for Bayesian Forecasting in Critically Ill Patients

Simon Kallee<sup>1</sup>, Christina Scharf<sup>1</sup>, Lea Marie Schatz<sup>2</sup>, Michael Paal<sup>3</sup>, Michael Vogeser<sup>3</sup>, Michael Irlbeck<sup>1</sup>, Johannes Zander<sup>4</sup>, Michael Zoller<sup>1</sup>, Uwe Liebchen<sup>1\*</sup>

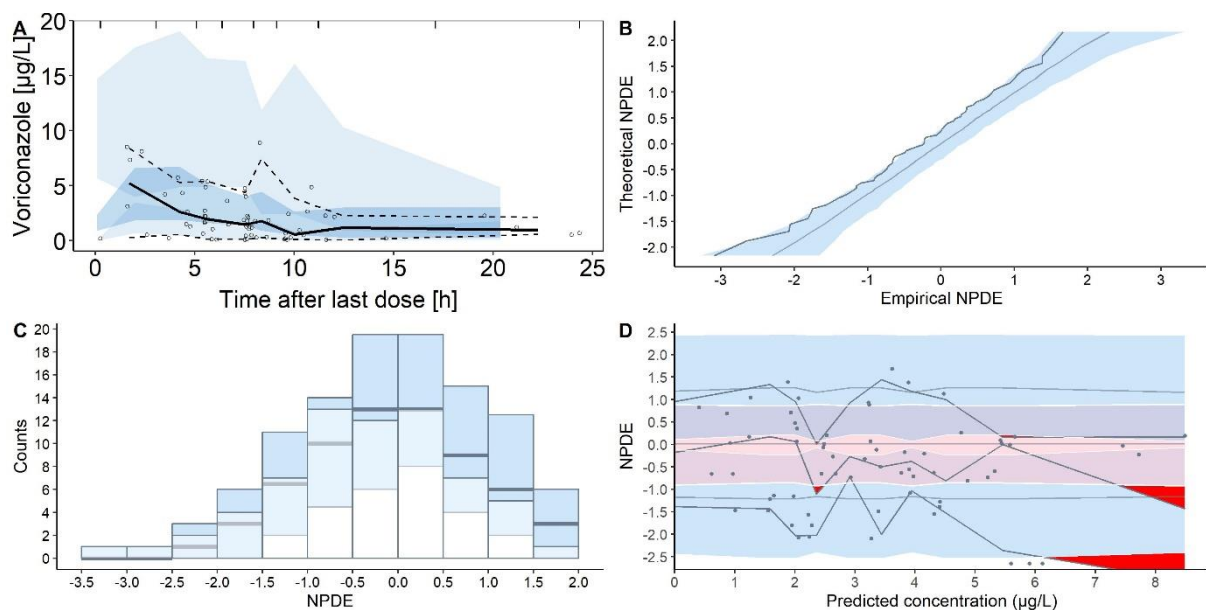

**Figure S1.** Graphical evaluation of the model by Chen et al. **A:** Visual predictive check. Light blue shaded regions: 90% prediction bands associated with the 5<sup>th</sup> and 95<sup>th</sup> percentiles of pharmacokinetic (PK) model simulations (N=1000 iterations). Dark blue region: 90% prediction band associated with the 50<sup>th</sup> percentile of PK model simulations. Dashed lines: 5<sup>th</sup> and 95<sup>th</sup> percentiles of observed data; solid line: 50<sup>th</sup> percentile of observed data. Dots: observed data. **B:** Quantile-Quantile plot. Theoretical Normalised Prediction Distribution Error (NPDE) vs empirical NPDE; light blue shaded region: Simulation based 95% prediction interval (N=1000 iterations) with 50<sup>th</sup> percentile (straight solid line); solid line: 50<sup>th</sup> percentile of the empirical NPDE; **C:** Theoretical vs empirical NPDE; light blue shaded region: 90% simulation based (N=1000) prediction interval; solid line: 50<sup>th</sup> percentile; white histogram: Empirical NPDE; **D:** Theoretical and empirical NPDE distribution vs. predicted voriconazole concentration. dots: observed concentrations; lines: 5<sup>th</sup>, 50<sup>th</sup> and 95<sup>th</sup> percentiles of observed concentrations; blue areas: 90% prediction intervals of the 5<sup>th</sup> and 95<sup>th</sup> percentiles; light red area: 90% prediction interval of the 50<sup>th</sup> percentile; the dark red area indicates a mismatch of the model.

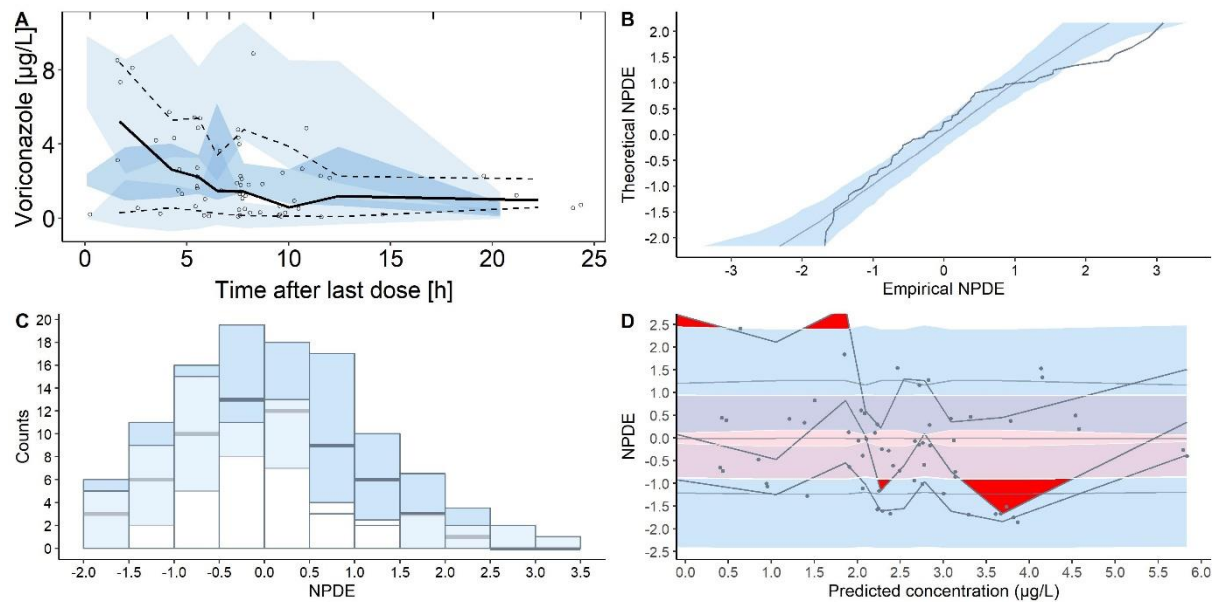

**Figure S2.** Graphical evaluation of the model by Chantharit et al. **A:** Visual predictive check. Light blue shaded regions: 90% prediction bands associated with the 5<sup>th</sup> and 95<sup>th</sup> percentiles of pharmacokinetic (PK) model simulations (N=1000 iterations). Dark blue region: 90% prediction band associated with the 50<sup>th</sup> percentile of PK model simulations. Dashed lines: 5<sup>th</sup> and 95<sup>th</sup> percentiles of observed data; solid line: 50<sup>th</sup> percentile of observed data. Dots: observed data. **B:** Quantile-Quantile plot. Theoretical Normalised Prediction Distribution Error (NPDE) vs empirical NPDE; light blue shaded region: Simulation based 95% prediction interval (N=1000 iterations) with 50<sup>th</sup> percentile (straight solid line); solid line: 50<sup>th</sup> percentile of the empirical NPDE; **C:** Theoretical vs empirical NPDE; light blue shaded region: 90% simulation based (N=1000) prediction interval; solid line: 50<sup>th</sup> percentile; white histogram: Empirical NPDE; **D:** Theoretical and empirical NPDE distribution vs. predicted voriconazole concentration. dots: observed concentrations; lines: 5<sup>th</sup>, 50<sup>th</sup> and 95<sup>th</sup> percentiles of observed concentrations; blue areas: 90% prediction intervals of the 5<sup>th</sup> and 95<sup>th</sup> percentiles; light red area: 90% prediction interval of the 50<sup>th</sup> percentile; the dark red area indicates a mismatch of the model.

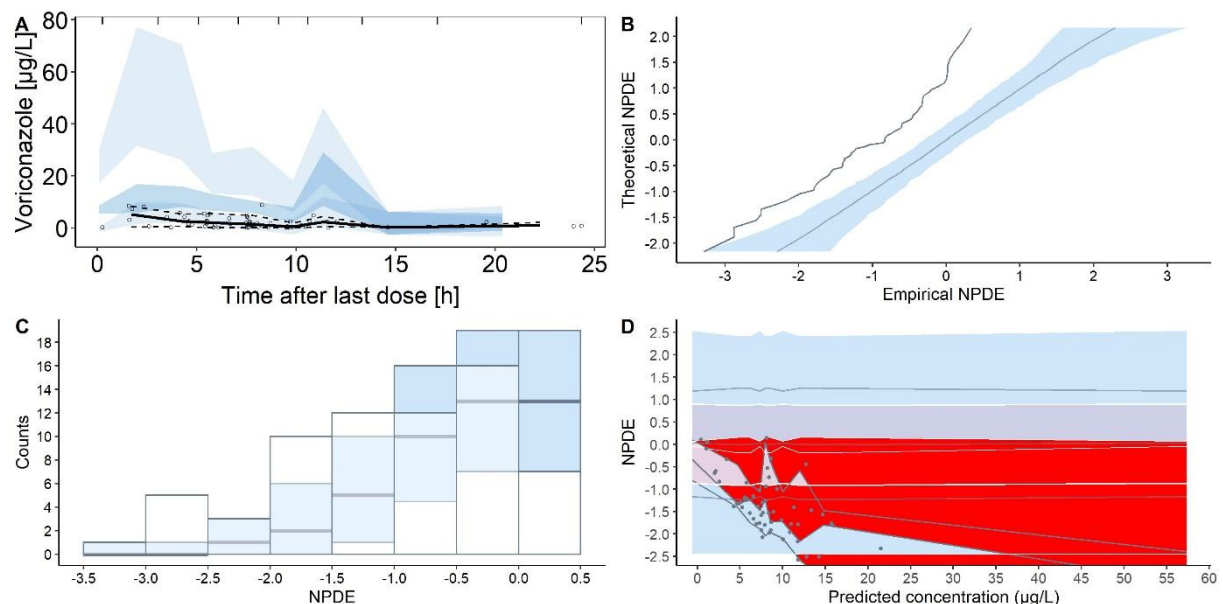

**Figure S3.** Graphical evaluation of the model by Khan-asa et al.. **A:** Visual predictive check. Light blue shaded regions: 90% prediction bands associated with the 5<sup>th</sup> and 95<sup>th</sup> percentiles of pharmacokinetic (PK) model simulations (N=1000 iterations). Dark blue region: 90% prediction band associated with the 50<sup>th</sup> percentile of PK model simulations. Dashed lines: 5<sup>th</sup> and 95<sup>th</sup> percentiles of observed data; solid line: 50<sup>th</sup> percentile of observed data. Dots: observed data. **B:** Quantile-Quantile plot. Theoretical Normalised Prediction Distribution Error (NPDE) vs empirical NPDE; light blue shaded region: Simulation based 95% prediction interval (N=1000 iterations) with 50<sup>th</sup> percentile (straight solid line); solid line: 50<sup>th</sup> percentile of the empirical NPDE; **C:** Theoretical vs empirical NPDE; light blue shaded region: 90% simulation based (N=1000) prediction interval; solid line: 50<sup>th</sup> percentile; white histogram: Empirical NPDE; **D:** Theoretical and empirical

NPDE distribution vs. predicted voriconazole concentration. dots: observed concentrations; lines: 5th, 50th and 95th percentiles of observed concentrations; blue areas: 90% prediction intervals of the 5th and 95th percentiles; light red area: 90% prediction interval of the 50th percentile; the dark red area indicates a mismatch of the model.

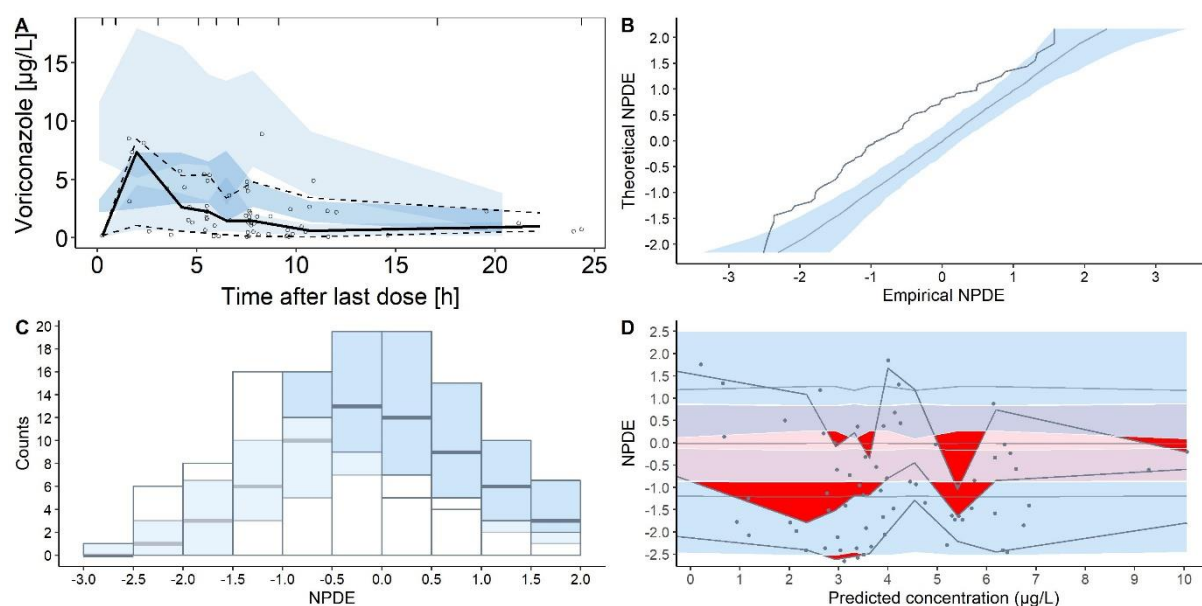

**Figure S4.** Graphical evaluation of the model by Pascual et al. **A:** Visual predictive check. Light blue shaded regions: 90% prediction bands associated with the 5<sup>th</sup> and 95<sup>th</sup> percentiles of pharmacokinetic (PK) model simulations (N=1000 iterations). Dark blue region: 90% prediction band associated with the 50<sup>th</sup> percentile of PK model simulations. Dashed lines: 5<sup>th</sup> and 95<sup>th</sup> percentiles of observed data; solid line: 50<sup>th</sup> percentile of observed data. Dots: observed data. **B:** Quantile-Quantile plot. Theoretical Normalised Prediction Distribution Error (NPDE) vs empirical NPDE; light blue shaded region: Simulation based 95% prediction interval (N=1000 iterations) with 50<sup>th</sup> percentile (straight solid line); solid line: 50<sup>th</sup> percentile of the empirical NPDE; **C:** Theoretical vs empirical NPDE; light blue shaded region: 90% simulation based (N=1000) prediction interval; solid line: 50<sup>th</sup> percentile; white histogram: Empirical NPDE; **D:** Theoretical and empirical NPDE distribution vs. predicted voriconazole concentration. dots: observed concentrations; lines: 5th, 50th and 95th percentiles of observed concentrations; blue areas: 90% prediction intervals of the 5th and 95th percentiles; light red area: 90% prediction interval of the 50<sup>th</sup> percentile; the dark red area indicates a mismatch of the model.

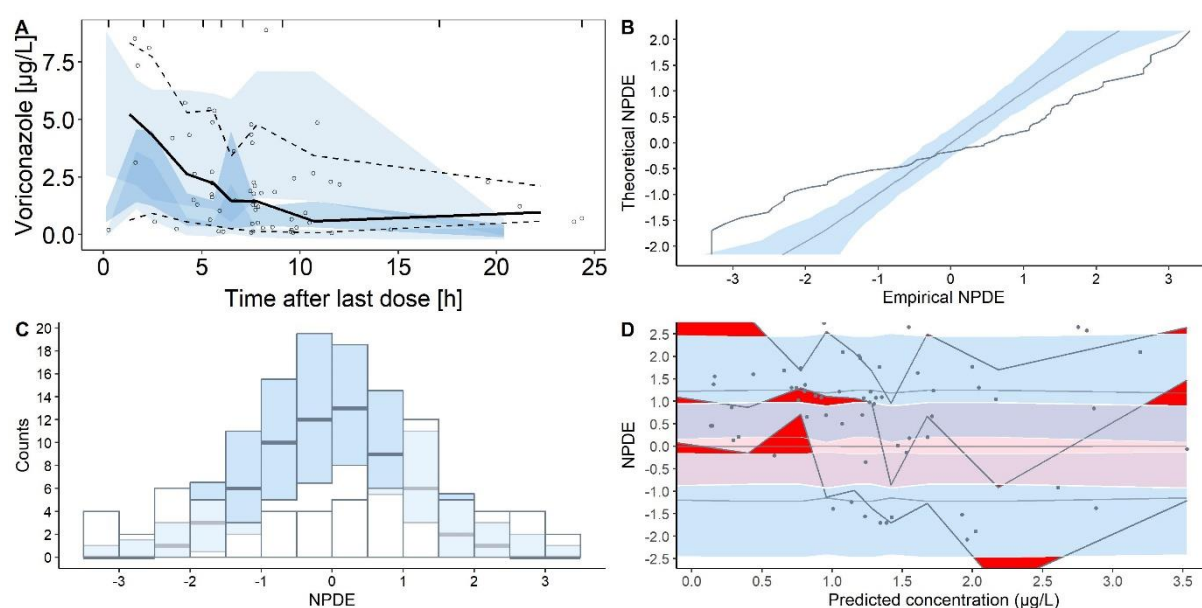

**Figure S5.** Graphical evaluation of the model by Perez-Pitarch et al.. **A:** Visual predictive check. Light blue shaded regions: 90% prediction bands associated with the 5<sup>th</sup> and 95<sup>th</sup> percentiles of pharmacokinetic (PK) model simulations (N=1000

iterations). Dark blue region: 90% prediction band associated with the 50<sup>th</sup> percentile of PK model simulations. Dashed lines: 5<sup>th</sup> and 95<sup>th</sup> percentiles of observed data; solid line: 50<sup>th</sup> percentile of observed data. Dots: observed data. **B:** Quantile-Quantile plot. Theoretical Normalised Prediction Distribution Error (NPDE) vs empirical NPDE; light blue shaded region: Simulation based 95% prediction interval (N=1000 iterations) with 50<sup>th</sup> percentile (straight solid line); solid line: 50<sup>th</sup> percentile of the empirical NPDE; **C:** Theoretical vs empirical NPDE; light blue shaded region: 90% simulation based (N=1000) prediction interval; solid line: 50<sup>th</sup> percentile; white histogram: Empirical NPDE; **D:** Theoretical and empirical NPDE distribution vs. predicted voriconazole concentration. dots: observed concentrations; lines: 5<sup>th</sup>, 50<sup>th</sup> and 95<sup>th</sup> percentiles of observed concentrations; blue areas: 90% prediction intervals of the 5<sup>th</sup> and 95<sup>th</sup> percentiles; light red area: 90% prediction interval of the 50<sup>th</sup> percentile; the dark red area indicates a mismatch of the model.

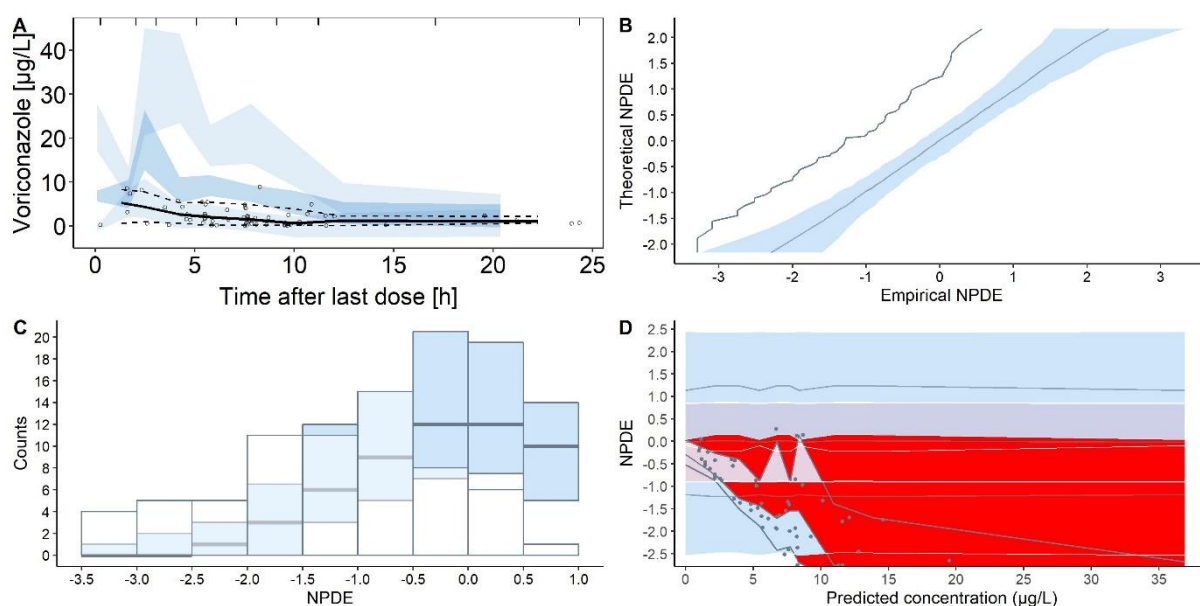

**Figure S6.** Graphical evaluation of the model by Tang et al. 2019. **A:** Visual predictive check. Light blue shaded regions: 90% prediction bands associated with the 5<sup>th</sup> and 95<sup>th</sup> percentiles of pharmacokinetic (PK) model simulations (N=1000 iterations). Dark blue region: 90% prediction band associated with the 50<sup>th</sup> percentile of PK model simulations. Dashed lines: 5<sup>th</sup> and 95<sup>th</sup> percentiles of observed data; solid line: 50<sup>th</sup> percentile of observed data. Dots: observed data. **B:** Quantile-Quantile plot. Theoretical Normalised Prediction Distribution Error (NPDE) vs empirical NPDE; light blue shaded region: Simulation based 95% prediction interval (N=1000 iterations) with 50<sup>th</sup> percentile (straight solid line); solid line: 50<sup>th</sup> percentile of the empirical NPDE; **C:** Theoretical vs empirical NPDE; light blue shaded region: 90% simulation based (N=1000) prediction interval; solid line: 50<sup>th</sup> percentile; white histogram: Empirical NPDE; **D:** Theoretical and empirical NPDE distribution vs. predicted voriconazole concentration. dots: observed concentrations; lines: 5<sup>th</sup>, 50<sup>th</sup> and 95<sup>th</sup> percentiles of observed concentrations; blue areas: 90% prediction intervals of the 5<sup>th</sup> and 95<sup>th</sup> percentiles; light red area: 90% prediction interval of the 50<sup>th</sup> percentile; the dark red area indicates a mismatch of the model.

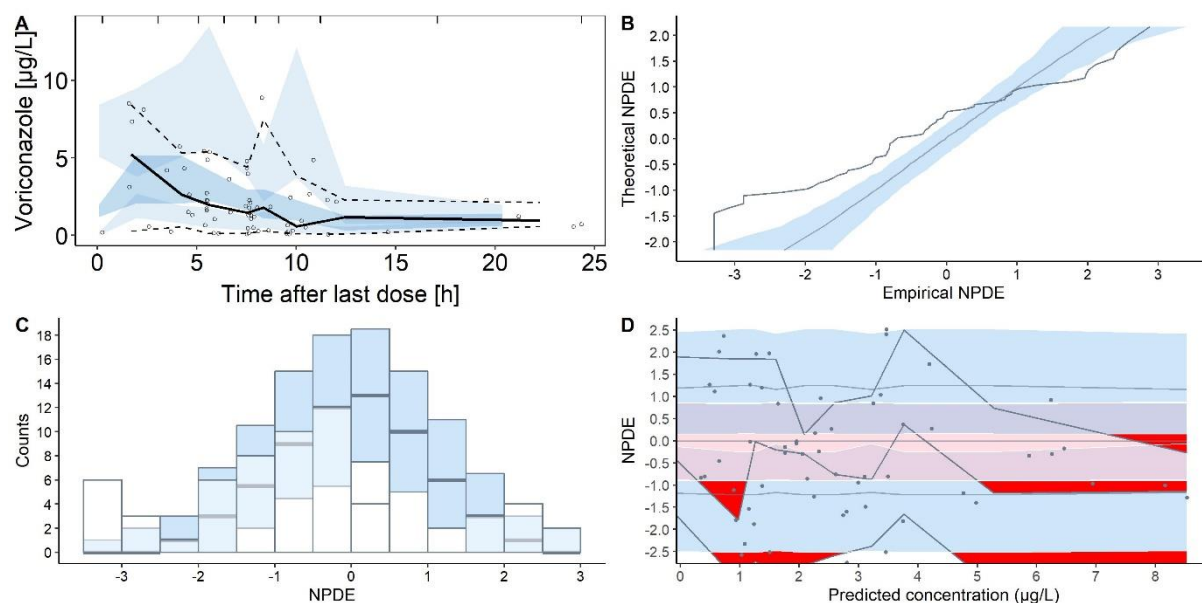

**Figure S7.** Graphical evaluation of the model by Tang et al. 2021. **A:** Visual predictive check. Light blue shaded regions: 90% prediction bands associated with the 5<sup>th</sup> and 95<sup>th</sup> percentiles of pharmacokinetic (PK) model simulations (N=1000 iterations). Dark blue region: 90% prediction band associated with the 50<sup>th</sup> percentile of PK model simulations. Dashed lines: 5<sup>th</sup> and 95<sup>th</sup> percentiles of observed data; solid line: 50<sup>th</sup> percentile of observed data. Dots: observed data. **B:** Quantile-Quantile plot. Theoretical Normalised Prediction Distribution Error (NPDE) vs empirical NPDE; light blue shaded region: Simulation based 95% prediction interval (N=1000 iterations) with 50<sup>th</sup> percentile (straight solid line); solid line: 50<sup>th</sup> percentile of the empirical NPDE; **C:** Theoretical vs empirical NPDE; light blue shaded region: 90% simulation based (N=1000) prediction interval; solid line: 50<sup>th</sup> percentile; white histogram: Empirical NPDE; **D:** Theoretical and empirical NPDE distribution vs. predicted voriconazole concentration. dots: observed concentrations; lines: 5<sup>th</sup>, 50<sup>th</sup> and 95<sup>th</sup> percentiles of observed concentrations; blue areas: 90% prediction intervals of the 5<sup>th</sup> and 95<sup>th</sup> percentiles; light red area: 90% prediction interval of the 50<sup>th</sup> percentile; the dark red area indicates a mismatch of the model.
